# Supplementary material for: The ubiquity and coexistence of two FBPases in chloroplasts of photosynthetic eukaryotes and its evolutionary and functional implications
Source: PubMed Central journal article supplement — Plant Divers. 2019 Sep 26;42(2):120–5. doi: 10.1016/j.pld.2019.09.002 (PMC7195585; doi:10.1016/j.pld.2019.09.002), 2019-09-26
Supplement: mmc1.pdf [file mmc1.pdf]

| Species                             | Protein      | Unique Identifier           | Data source                                                                                                                             | TargetP prediction |
|-------------------------------------|--------------|-----------------------------|-----------------------------------------------------------------------------------------------------------------------------------------|--------------------|
| <i>Desulfovibrio vulgaris</i>       | Dvu_FBPaseI  | A1VD23                      | UniProt                                                                                                                                 | –                  |
| <i>Anabaena variabilis</i>          | Ava_FBPaseI  | Q3MCI4                      | UniProt                                                                                                                                 | –                  |
| <i>Bigelowiella natans</i>          | Bna_cyFBPase | 92362                       | <a href="https://genome.jgi.doe.gov/Bigna1/Bigna1.home.html">https://genome.jgi.doe.gov/Bigna1/Bigna1.home.html</a>                     | Any other location |
| <i>Galdieria sulphuraria</i>        | Gsu_cyFBPase | XP_005709391.1              | NCBI                                                                                                                                    | Any other location |
| <i>Cyanidioschyzon merolae</i>      | Cme_cyFBPase | XP_005535415.1              | NCBI                                                                                                                                    | Any other location |
| <i>Porphyra umbilicalis</i>         | Pum_cyFBPase | Pum0229s0029.1.p            | Phytozome                                                                                                                               | Any other location |
| <i>Porphyra umbilicalis</i>         | Pum_cyFBPase | Pum0654s0006.1.p            | Phytozome                                                                                                                               | Any other location |
| <i>Cyanidioschyzon merolae</i>      | Cme_cyFBPase | XP_005537806.1              | NCBI                                                                                                                                    | Any other location |
| <i>Galdieria sulphuraria</i>        | Gsu_cyFBPase | XP_005707946.1              | NCBI                                                                                                                                    | Any other location |
| <i>Porphyra umbilicalis</i>         | Pum_cyFBPase | OSX71615.1                  | NCBI                                                                                                                                    | Any other location |
| <i>Chondrus crispus</i>             | Ccr_cyFBPase | XP_005712315.1              | NCBI                                                                                                                                    | Any other location |
| <i>Porphyridium purpureum</i>       | Ppu_cyFBPase | contig_3402.5               | <a href="http://cyanophora.rutgers.edu/porphyridium/">http://cyanophora.rutgers.edu/porphyridium/</a>                                   | Any other location |
| <i>Ostreococcus tauri</i>           | Ota_cyFBPase | XP_003080995.2              | NCBI                                                                                                                                    | Any other location |
| <i>Ostreococcus lucimarinus</i>     | Olu_cyFBPase | XP_001419675.1              | NCBI                                                                                                                                    | Mitochondrion      |
| <i>Ostreococcus</i> sp. RCC809      | Osp_cyFBPase | 59046                       | <a href="https://genome.jgi.doe.gov/OstRCC809_2/OstRCC809_2.home.html">https://genome.jgi.doe.gov/OstRCC809_2/OstRCC809_2.home.html</a> | Mitochondrion      |
| <i>Bathycoccus prasinus</i>         | Bpr_cyFBPase | XP_007510822.1              | NCBI                                                                                                                                    | Any other location |
| <i>Micromonas commoda</i> RCC 299   | Mco_cyFBPase | XP_002506051.1              | NCBI                                                                                                                                    | Any other location |
| <i>Micromonas pusilla</i> CCMP 1545 | Mpu_cyFBPase | XP_003057094.1              | NCBI                                                                                                                                    | Chloroplast        |
| <i>Cyanophora paradoxa</i>          | Cpa_cyFBPase | Contig11350-abinit-gene-0.1 | <a href="http://cyanophora.rutgers.edu/cyanophora/">http://cyanophora.rutgers.edu/cyanophora/</a>                                       | Any other location |
| <i>Arabidopsis thaliana</i>         | Ath_cyFBPase | NP_175032.1                 | NCBI                                                                                                                                    | Any other location |
| <i>Fragaria x ananassa</i>          | Fan_cyFBPase | ABW38332.1                  | NCBI                                                                                                                                    | Any other location |
| <i>Marchantia polymorpha</i>        | Mpo_cyFBPase | Mapoly0005s0291.2.p         | Phytozome                                                                                                                               | Any other location |

|                                        |                  |                      |                                                                                                                     |                    |
|----------------------------------------|------------------|----------------------|---------------------------------------------------------------------------------------------------------------------|--------------------|
| <i>Marchantia polymorpha</i>           | Mpo_cyFBPase     | Mapoly0005s0291.1.p  | Phytozome                                                                                                           | Any other location |
| <i>Physcomitrella patens</i>           | Ppa_cyFBPase     | Pp3c3_1090V3.1.p     | Phytozome                                                                                                           | Any other location |
| <i>Physcomitrella patens</i>           | Ppa_cyFBPase     | Pp3c13_1900V3.1.p    | Phytozome                                                                                                           | Any other location |
| <i>Selaginella moellendorffii</i>      | Smo_cyFBPase     | D8RRD1               | UniProt                                                                                                             | Any other location |
| <i>Selaginella moellendorffii</i>      | Smo_cyFBPase     | D8SBY7               | UniProt                                                                                                             | Any other location |
| <i>Selaginella moellendorffii</i>      | Smo_cyFBPase     | D8QTD0               | UniProt                                                                                                             | Any other location |
| <i>Auxenochlorella protothecoides</i>  | Apr_cyFBPase     | XP_011400401.1       | NCBI                                                                                                                | Any other location |
| <i>Picochlorum</i> sp. SENEW3          | Psp_cyFBPase     | XP_002948170.1       | NCBI                                                                                                                | Any other location |
| <i>Chlorella variabilis</i> NC64A      | Cva_cyFBPase     | XP_005845821.1       | NCBI                                                                                                                | Any other location |
| <i>Chlorella sorokiniana</i> str. 1228 | Cso1228_cyFBPase | CSI_122800009552-RA  | Greenhouse                                                                                                          | Any other location |
| <i>Chlorella sorokiniana</i> UTEX 1230 | Cso1230_cyFBPase | CSI2_123000008062-RA | Greenhouse                                                                                                          | Any other location |
| <i>Chlorella sorokiniana</i> DOE1412   | Cso1412_cyFBPase | CSJ00003447-RA       | Greenhouse                                                                                                          | Any other location |
| <i>Bigelowiella natans</i>             | Bna_cyFBPase     | 85805                | <a href="https://genome.jgi.doe.gov/Bigna1/Bigna1.home.html">https://genome.jgi.doe.gov/Bigna1/Bigna1.home.html</a> | Any other location |
| <i>Euglena gracilis</i>                | Egr_cyFBPase     | ABF68600.1           | NCBI                                                                                                                | Secretory pathway  |
| <i>Euglena gracilis</i>                | Egr_cyFBPase     | BAU20292.1           | NCBI                                                                                                                | Chloroplast        |
| <i>Phaeodactylum tricorutum</i>        | Ptr_cyFBPase     | 23247                | <a href="https://genome.jgi.doe.gov/Phatr2/Phatr2.home.html">https://genome.jgi.doe.gov/Phatr2/Phatr2.home.html</a> | Any other location |
| <i>Thalassiosira oceanica</i>          | Toc_cyFBPase     | EJK72926.1           | NCBI                                                                                                                | Mitochondrion      |
| <i>Ectocarpus siliculosus</i>          | Esi_cpFBPase2    | CBN75354.1           | NCBI                                                                                                                | Chloroplast        |
| <i>Phaeodactylum tricorutum</i>        | Ptr_cpFBPase2    | 31994                | <a href="https://genome.jgi.doe.gov/Phatr2/Phatr2.home.html">https://genome.jgi.doe.gov/Phatr2/Phatr2.home.html</a> | Any other location |
| <i>Thalassiosira oceanica</i>          | Toc_cpFBPase2    | EJK67142.1           | NCBI                                                                                                                | Mitochondrion      |
| <i>Ectocarpus siliculosus</i>          | Esi_cpFBPase2    | CBN77737.1           | NCBI                                                                                                                | Mitochondrion      |
| <i>Euglena gracilis</i>                | Egr_cpFBPase2    | BAU20291.1           | NCBI                                                                                                                | Chloroplast        |
| <i>Bigelowiella natans</i>             | Bna_cpFBPase2    | 38456                | <a href="https://genome.jgi.doe.gov/Bigna1/Bigna1.home.html">https://genome.jgi.doe.gov/Bigna1/Bigna1.home.html</a> | Any other location |
| <i>Porphyridium purpureum</i>          | Ppu_cpFBPase2    | contig_3490.10       | <a href="http://cyanophora.rutgers.edu/porphyridium/">http://cyanophora.rutgers.edu/porphyridium/</a>               | Chloroplast        |
| <i>Bathycoccus prasinos</i>            | Bpr_cpFBPase2    | XP_007512791.1       | NCBI                                                                                                                | Any other location |
| <i>Micromonas pusilla</i> CCMP 1545    | Mpu_cpFBPase2    | XP_003063661.1       | NCBI                                                                                                                | Chloroplast        |
| <i>Micromonas commoda</i> RCC 299      | Mco_cpFBPase2    | XP_002499881.1       | NCBI                                                                                                                | Chloroplast        |

|                                    |               |                           |                                                                                                                                         |                    |
|------------------------------------|---------------|---------------------------|-----------------------------------------------------------------------------------------------------------------------------------------|--------------------|
| <i>Ostreococcus</i> sp. RCC809     | Osp_cpFBPase2 | 32079                     | <a href="https://genome.jgi.doe.gov/OstRCC809_2/OstRCC809_2.home.html">https://genome.jgi.doe.gov/OstRCC809_2/OstRCC809_2.home.html</a> | Mitochondrion      |
| <i>Ostreococcus lucimarinus</i>    | Olu_cpFBPase2 | XP_001417955.1            | NCBI                                                                                                                                    | Mitochondrion      |
| <i>Ostreococcus tauri</i>          | Ota_cpFBPase2 | XP_022838959.1            | NCBI                                                                                                                                    | Any other location |
| <i>Marchantia polymorpha</i>       | Mpo_cpFBPase2 | Mapoly0066s0105.1.p       | Phytozome                                                                                                                               | Chloroplast        |
| <i>Selaginella moellendorffii</i>  | Smo_cpFBPase2 | D8RVB3                    | UniProt                                                                                                                                 | Secretory pathway  |
| <i>Physcomitrella patens</i>       | Ppa_cpFBPase2 | Pp3c18_4950V3.1.p         | Phytozome                                                                                                                               | Chloroplast        |
| <i>Physcomitrella patens</i>       | Ppa_cpFBPase2 | Pp3c22_22950V3.1.p        | Phytozome                                                                                                                               | Chloroplast        |
| <i>Physcomitrella patens</i>       | Ppa_cpFBPase2 | Pp3c24_11070V3.1.p        | Phytozome                                                                                                                               | Any other location |
| <i>Fragaria x ananassa</i>         | Fan_cpFBPase2 | ABW38331.1                | NCBI                                                                                                                                    | Chloroplast        |
| <i>Arabidopsis thaliana</i>        | Ath_cpFBPase2 | NP_201243.1               | NCBI                                                                                                                                    | Mitochondrion      |
| <i>Chromochloris zofingiensis</i>  | Czo_cpFBPase2 | Cz01g04250.t1             | Phytozome                                                                                                                               | Chloroplast        |
| <i>Cyanidioschyzon merolae</i>     | Cme_cpFBPase1 | XP_005537627.1            | NCBI                                                                                                                                    | Chloroplast        |
| <i>Galdieria sulphuraria</i>       | Gsu_cpFBPase1 | XP_005703487.1            | NCBI                                                                                                                                    | Chloroplast        |
| <i>Galdieria sulphuraria</i>       | Gsu_cpFBPase1 | XP_005703442.1            | NCBI                                                                                                                                    | Any other location |
| <i>Porphyra umbilicalis</i>        | Pum_cpFBPase1 | OSX71660.1                | NCBI                                                                                                                                    | Chloroplast        |
| <i>Porphyra umbilicalis</i>        | Pum_cpFBPase1 | OSX75977.1                | NCBI                                                                                                                                    | Chloroplast        |
| <i>Chondrus crispus</i>            | Ccr_cpFBPase1 | XP_005713305.1            | NCBI                                                                                                                                    | Chloroplast        |
| <i>Porphyridium purpureum</i>      | Ppu_cpFBPase1 | contig_3540.6             | <a href="http://cyanophora.rutgers.edu/porphyridium/">http://cyanophora.rutgers.edu/porphyridium/</a>                                   | Any other location |
| <i>Ectocarpus siliculosus</i>      | Esi_cpFBPase1 | CBN74703.1                | NCBI                                                                                                                                    | Chloroplast        |
| <i>Ectocarpus siliculosus</i>      | Esi_cpFBPase1 | CBN76290.1                | NCBI                                                                                                                                    | Chloroplast        |
| <i>Phaeodactylum tricornerutum</i> | Ptr_cpFBPase1 | 2793                      | <a href="https://genome.jgi.doe.gov/Phatr2/Phatr2.home.html">https://genome.jgi.doe.gov/Phatr2/Phatr2.home.html</a>                     | Any other location |
| <i>Thalassiosira oceanica</i>      | Toc_cpFBPase1 | EJK50041.1                | NCBI                                                                                                                                    | Mitochondrion      |
| <i>Phaeodactylum tricornerutum</i> | Ptr_cpFBPase1 | 9359                      | <a href="https://genome.jgi.doe.gov/Phatr2/Phatr2.home.html">https://genome.jgi.doe.gov/Phatr2/Phatr2.home.html</a>                     | Any other location |
| <i>Phaeodactylum tricornerutum</i> | Ptr_cpFBPase1 | 8744                      | <a href="https://genome.jgi.doe.gov/Phatr2/Phatr2.home.html">https://genome.jgi.doe.gov/Phatr2/Phatr2.home.html</a>                     | Any other location |
| <i>Euglena gracilis</i>            | Egr_cpFBPase1 | ABF68597.1                | NCBI                                                                                                                                    | Any other location |
| <i>Bigelowiella natans</i>         | Bna_cpFBPase1 | 51585                     | <a href="https://genome.jgi.doe.gov/Bigna1/Bigna1.home.html">https://genome.jgi.doe.gov/Bigna1/Bigna1.home.html</a>                     | Mitochondrion      |
| <i>Cyanophora paradoxa</i>         | Cpa_cpFBPase1 | Contig53396-snap-gene-0.1 | <a href="http://cyanophora.rutgers.edu/cyanophora/">http://cyanophora.rutgers.edu/cyanophora/</a>                                       | Chloroplast        |

|                                        |                   |                      |                                                                                                                                         |                    |
|----------------------------------------|-------------------|----------------------|-----------------------------------------------------------------------------------------------------------------------------------------|--------------------|
| <i>Micromonas commoda</i> RCC 299      | Mco_cpFBPase1     | XP_002505568.1       | NCBI                                                                                                                                    | Chloroplast        |
| <i>Micromonas commoda</i> RCC 299      | Mco_cpFBPase1     | XP_002505565.1       | NCBI                                                                                                                                    | Chloroplast        |
| <i>Micromonas pusilla</i> CCMP 1545    | Mpu_cpFBPase1     | XP_003056260.1       | NCBI                                                                                                                                    | Chloroplast        |
| <i>Micromonas pusilla</i> CCMP 1545    | Mpu_cpFBPase1     | XP_003063679.1       | NCBI                                                                                                                                    | Chloroplast        |
| <i>Bathycoccus prasinus</i>            | Bpr_cpFBPase1     | XP_007509936.1       | NCBI                                                                                                                                    | Chloroplast        |
| <i>Ostreococcus</i> sp. RCC809         | Osp_cpFBPase1     | 43222                | <a href="https://genome.jgi.doe.gov/OstRCC809_2/OstRCC809_2.home.html">https://genome.jgi.doe.gov/OstRCC809_2/OstRCC809_2.home.html</a> | Mitochondrion      |
| <i>Ostreococcus lucimarinus</i>        | Olu_cpFBPase1     | XP_001422674.1       | NCBI                                                                                                                                    | Any other location |
| <i>Ostreococcus tauri</i>              | Ota_cpFBPase1     | XP_003082905.2       | NCBI                                                                                                                                    | Mitochondrion      |
| <i>Ostreococcus lucimarinus</i>        | Olu_cpFBPase1     | XP_001416538.1       | NCBI                                                                                                                                    | Chloroplast        |
| <i>Ostreococcus tauri</i>              | Ota_cpFBPase1     | XP_003077945.1       | NCBI                                                                                                                                    | Mitochondrion      |
| <i>Ostreococcus</i> sp. RCC809         | Osp_cpFBPase1     | 54446                | <a href="https://genome.jgi.doe.gov/OstRCC809_2/OstRCC809_2.home.html">https://genome.jgi.doe.gov/OstRCC809_2/OstRCC809_2.home.html</a> | Chloroplast        |
| <i>Bathycoccus prasinus</i>            | Bpr_cpFBPase1     | XP_007509205.1       | NCBI                                                                                                                                    | Chloroplast        |
| <i>Auxenochlorella protothecoides</i>  | Apr_cpFBPase1     | XP_011398191.1       | NCBI                                                                                                                                    | Chloroplast        |
| <i>Picochlorum</i> sp. SENEW3          | Psp_cpFBPase1     | 3559                 | <a href="https://genome.jgi.doe.gov/Picsp_1/Picsp_1.home.html">https://genome.jgi.doe.gov/Picsp_1/Picsp_1.home.html</a>                 | Chloroplast        |
| <i>Chlorella variabilis</i> NC64A      | Cva_cpFBPase1     | XP_005848342.1       | NCBI                                                                                                                                    | Chloroplast        |
| <i>Chlorella sorokiniana</i> str. 1228 | Cso1228_cpFBPase1 | CSI_122800007620-RA  | Greenhouse                                                                                                                              | Any other location |
| <i>Chlorella sorokiniana</i> UTEX 1230 | Cso1230_cpFBPase1 | CSI2_123000004721-RA | Greenhouse                                                                                                                              | Chloroplast        |
| <i>Chlorella sorokiniana</i> DOE1412   | Cso1412_cpFBPase1 | CSJ00005697-RA       | Greenhouse                                                                                                                              | Chloroplast        |
| <i>Chlamydomonas reinhardtii</i>       | Cre_cpFBPase1     | XP_001690872.1       | NCBI                                                                                                                                    | Chloroplast        |
| <i>Volvox carteri</i>                  | Vca_cpFBPase1     | XP_002948170.1       | NCBI                                                                                                                                    | Chloroplast        |
| <i>Dunaliella salina</i>               | Dsa_cpFBPase1     | Dusal.0106s00008.1.p | Phytozome                                                                                                                               | Chloroplast        |
| <i>Chromochloris zofingiensis</i>      | Czo_cpFBPase1     | Cz04g03070.t1        | Phytozome                                                                                                                               | Chloroplast        |
| <i>Monoraphidium neglectum</i>         | Mne_cpFBPase1     | XP_013899573.1       | NCBI                                                                                                                                    | Chloroplast        |
| <i>Selaginella moellendorffii</i>      | Smo_cpFBPase1     | D8RW89               | UniProt                                                                                                                                 | Chloroplast        |
| <i>Physcomitrella patens</i>           | Ppa_cpFBPase1     | Pp3c7_15760V3.1.p    | Phytozome                                                                                                                               | Chloroplast        |
| <i>Physcomitrella patens</i>           | Ppa_cpFBPase1     | Pp3c19_12890V3.1.p   | Phytozome                                                                                                                               | Chloroplast        |
| <i>Marchantia polymorpha</i>           | Mpo_cpFBPase1     | Mapoly0047s0030.1.p  | Phytozome                                                                                                                               | Chloroplast        |

|                             |               |                |      |             |
|-----------------------------|---------------|----------------|------|-------------|
| <i>Arabidopsis thaliana</i> | Ath_cpFBPase1 | NP_001190083.1 | NCBI | Chloroplast |
| <i>Fragaria x ananassa</i>  | Fan_cpFBPase1 | ABW38330.1     | NCBI | Chloroplast |

---
