# Supplementary material for: The ubiquity and coexistence of two FBPases in chloroplasts of photosynthetic eukaryotes and its evolutionary and functional implications
Source: PubMed Central journal article supplement — Plant Divers. 2019 Sep 26;42(2):120–5. doi: 10.1016/j.pld.2019.09.002 (PMC7195585; doi:10.1016/j.pld.2019.09.002), 2019-09-26
Supplement: mmc2.pdf [file mmc2.pdf]

Cpa\_cpFBPase1\_Contig53396-snap LIVLSSISLACKQIA...  
Cpa\_cpFBPase1\_Contig11350-abini PTQ-LRSLLMG...  
Apr\_cpFBPase1\_XP\_011398191.1 VAVISSLALACKQIA...  
Apr\_cpFBPase1\_XP\_011400401.1 LTVLLNNAITV...  
Bpr\_cpFBPase1\_XP\_007509205.1 HAVILQSI...  
Bpr\_cpFBPase1\_XP\_007512971.1 L---LVAIANACAE...  
Bpr\_cpFBPase1\_XP\_007509936.1 LVIVINSIA...  
Bpr\_cpFBPase1\_XP\_007510822.1 LIRLMKIAS...  
Cre\_cpFBPase1\_XP\_001690872.1 LATVISS...  
Cso1228\_cpFBPase1\_CSI\_12280000 LT-----L...  
Cso1228\_cpFBPase1\_CSI\_122800009 LTVLLNAI...  
Cso1230\_cpFBPase1\_CSI2\_12300000 LA-----L...  
Cso1230\_cpFBPase1\_CSI2\_12300000 LTVLLNAI...  
Cso1412\_cpFBPase1\_CSI2\_12300000 LA-----L...  
Cso1412\_cpFBPase1\_CSI2\_123000009 LTVLLNAI...  
Cva\_cpFBPase1\_XP\_005848342.1 LAAVSSIA...  
Cva\_cpFBPase1\_XP\_005848342.1 L-----AGM...  
Czo\_cpFBPase1\_XP\_005848342.1 L---VNAIQAG...  
Czo\_cpFBPase1\_XP\_005848342.1 LAIVLSS...  
Dsa\_cpFBPase1\_Dusal\_0106050008 LATVIAS...  
Mco\_cpFBPase1\_XP\_002505568.1 LAVLSS...  
Mco\_cpFBPase1\_XP\_002505565.1 LAIVNNA...  
Mco\_cpFBPase1\_XP\_002499881.1 L---LVALA...  
Mco\_cpFBPase1\_XP\_002506051.1 LCILLQ...  
Mpu\_cpFBPase1\_XP\_003056260.1 LAIVLSS...  
Mpu\_cpFBPase1\_XP\_003063679.1 LSIINSIA...  
Mpu\_cpFBPase1\_XP\_003063661.1 L---LAALA...  
Mpu\_cpFBPase1\_XP\_003057094.1 LSIILQ...  
Mne\_cpFBPase1\_XP\_013899573.1 LAVLSS...  
Olu\_cpFBPase1\_XP\_001416538.1 LAVLSS...  
Olu\_cpFBPase1\_XP\_001417955.1 L---L---IS...  
Olu\_cpFBPase1\_XP\_001422674.1 LAIALNS...  
Olu\_cpFBPase1\_XP\_001419675.1 L-----M...  
Ota\_cpFBPase1\_XP\_003077945.1 LAVLSS...  
Ota\_cpFBPase1\_XP\_022838959.1 L---LVALA...  
Ota\_cpFBPase1\_XP\_003082905.2 LAIALNS...  
Ota\_cpFBPase1\_XP\_003080995.2 AAIV-RAL...  
Osp\_cpFBPase1\_54446 LAVLSS...  
Osp\_cpFBPase1\_32079 L---LVALA...  
Osp\_cpFBPase1\_43222 LAVALNS...  
Osp\_cpFBPase1\_59046 EASVVR...  
Psp\_cpFBPase1\_3559 LATVISS...  
Psp\_cpFBPase1\_002948170.1 LDDIFN...  
Vca\_cpFBPase1\_XP\_002948170.1 LATVISS...  
Ccr\_cpFBPase1\_XP\_005713305.1 MTLMS...  
Ccr\_cpFBPase1\_XP\_005712315.1 LTLLLA...  
Cme\_cpFBPase1\_XP\_005537627.1 LAPLITA...  
Cme\_cpFBPase1\_XP\_005537806.1 LTLLSA...  
Cme\_cpFBPase1\_XP\_005535415.1 LVAVFMA...  
Gsu\_cpFBPase1\_XP\_005703487.1 LT-VISS...  
Gsu\_cpFBPase1\_XP\_005703442.1 LT-VING...  
Gsu\_cpFBPase1\_XP\_005707946.1 LTLTTS...  
Gsu\_cpFBPase1\_XP\_005709391.1 LIMLLA...  
Pum\_cpFBPase1\_Osx71660.1 LQNLMA...  
Pum\_cpFBPase1\_Osx75977.1 MTLMA...  
Pum\_cpFBPase1\_Osx71615.1 LTLMLA...  
Pum\_cpFBPase1\_Pum0548006.1.p LTLTSA...  
Pum\_cpFBPase1\_Pum0229s0029.1.p LVLLT...  
Ppu\_cpFBPase1\_Contig\_3490.1 LR--LQ...  
Ppu\_cpFBPase1\_Contig\_3540.6 MENLMA...  
Ppu\_cpFBPase1\_Contig\_3402.5 LTLTSS...  
Mpo\_cpFBPase1\_Mapoly0066s0105. L---LM...  
Mpo\_cpFBPase1\_Mapoly0047s0030. LTVLNS...  
Mpo\_cpFBPase1\_Mapoly0005s0291.2 LTI...  
Mpo\_cpFBPase1\_Mapoly0005s0291.2 LTI...  
Ppa\_cpFBPase1\_Pp3c18\_4950V3.1 L---M...  
Ppa\_cpFBPase1\_Pp3c22\_22950V3.1 L---M...  
Ppa\_cpFBPase1\_Pp3c24\_11070V3.1 M---MA...  
Ppa\_cpFBPase1\_Pp3c19\_12890V3.1 LTVLSS...  
Ppa\_cpFBPase1\_Pp3c7\_15760V3.1 LTVLSS...  
Ppa\_cpFBPase1\_Pp3c3\_1090V3.1.p LTI...  
Ppa\_cpFBPase1\_Pp3c13\_1900V3.1.p LTI...  
Smo\_cpFBPase1\_D8RVB3 Smo\_cpFBPase1\_D8RVB3 LTVLSS...  
Smo\_cpFBPase1\_D8RD1 Smo\_cpFBPase1\_D8RD1 LTI...  
Smo\_cpFBPase1\_D8SBY7 Smo\_cpFBPase1\_D8SBY7 LTI...  
Smo\_cpFBPase1\_D8QTD0 L-----N...  
Ath\_cpFBPase1\_NP\_201243.1 L---LY...  
Ath\_cpFBPase1\_NP\_001190083.1 LTVMSS...  
Ath\_cpFBPase1\_NP\_17032.1 FTILLSH...  
Fan\_cpFBPase1\_ABW38332.1 FTILLSH...  
Fan\_cpFBPase1\_ABW38330.1 LTVLSS...  
Fan\_cpFBPase1\_ABW38331.1 L---PH...  
Dvu\_FBpase1\_A1VD23 FTLLND...  
Ava\_FBpase1\_Q3MCI4 LSA...  
ruler 1.....10.....20.....30.....40.....50.....60.....70.....80.....90.....100.....110.....120.....130.....140.....150.....160.....170.....180.....190.....200

Cpa\_cpFBPase1\_Contig53396-snap KNPNGKLRLLLYECAPMGFILEQAGGAAATGKGRIMTVKPEKVHQRPLPFLGSKK-VE  
Cpa\_cyFBPase\_Contig11350-abini K  
Apr\_cpFBPase1\_XP\_011398191.1 KNKTGKLRLLLYECAPMSYLAEQAGGLGTGTQRVLDLVEPEKIHQRVPLFCGSKS-VE  
Apr\_cyFBPase\_XP\_011400401.1 KNTKGKLRLLLYECYPMAYLIEQAGGRADERERLLREPEDIHDRAPVYLGSCEDVD  
Bpr\_cpFBPase1\_XP\_007509205.1 KNPNGKLRLLLYECAPMSFLAEQAGGAGDGTGRVLKINPEKVHQRVPLFCGSKS-VA  
Bpr\_cpFBPase2\_XP\_007512791.1 -----HLRVVVECNPLAFVAKCGGRADGERDILDILPADFHEKTPLFAGSSEEDIA  
Bpr\_cpFBPase1\_XP\_007509936.1 KATEGKARLLYEVAPIAMIAEQANGMAMADERVMEVKPMSIHOKSPMFVGSNS-VL  
Bpr\_cyFBPase\_XP\_007510822.1 ----GKLRMLYECFPMALMIEVAGGLSDTGSNLDLDAVESIHERGAIHLGSKENMD  
Cre\_cpFBPase1\_XP\_001690872.1 KNKNKLRLLLYECAPMSFIAEQAGGLGTQQRVLDVNPPEKVHQRVPLFCGSKK-VE  
Cso1228\_cpFBPase1\_CSI\_12280000 KNPNGKLRLLLYECAPMSMICEQAGGAGTGFQVRVDI-----VF-----TK-VE  
Cso1228\_cyFBPase\_CSI\_122800009 KSPDGKLRVLYECFPMAFLVEQEF-----GCK-----  
Cso1230\_cpFBPase1\_CSI2\_12300000 KNPNGKLRLLLYECAPMSMICEQAGGAGTGFQVRVDIVPTKVHERQPLFVGSKW-VE  
Cso1230\_cyFBPase\_CSI2\_12300000 KSPSGKLRVLYECFPMAFLVEQAGGKATGTSRTEIMPTSIHGR-----QAA  
Cso1412\_cpFBPase1\_CSI00005697- KNPNGKLRLLLYECAPMSMICEQAGGAGTGFQVRVDIVPTKVHERQPLFVGSKW-VE  
Cso1412\_cyFBPase\_CSI00003447-R KNPNGKLRVLYECFPMAFLVEQAGGKATGTARTMEMVPTSIHGRAPVYLGSKKEVE  
Cva\_cpFBPase1\_XP\_005848342.1 KNTNGKLRLLLYECAPMSMIAEQAGGKGTGFQVRVDIVPEAVHQRVPLFCGSKW-VE  
Cva\_cyFBPase\_XP\_005845821.1 KNPNGKLRVLYECFPMAFLVEQAGGKATGTQRSLTEMPDSIHDRAPVYLGSKKEVE  
Czo\_cpFBPase2\_Cz01g04250.t1 ----HLRLVVEANPMAFLVEQAGGRGDGKRRILDIPPTKLHQRPLFLGSPDDIA  
Czo\_cpFBPase1\_Cz04g03070.t1 KNKNKLRLLLYECAPMSMIAEQAGGKGTQQRVMDIVPTKVHQRVPLFVGSJK-VE  
Dsa\_cpFBPase1\_Dusa1.0106s00008 KNPNGKLRLLLYECAPMSFLAEQAGGKGTGKRPCLEIMPEKVHQRVPLFCGSKH-VE  
Mco\_cpFBPase1\_XP\_002505568.1 KNANGLKLRLLLYECAPMSFIAEQAGGMGTGRGRVLDIRPEEVHQRVPLFCGSKS-VO  
Mco\_cpFBPase1\_XP\_002505565.1 SAPQKARLLYEVAPMGFLAEQAGGMACAERKRVMEVVEQIHRSPMFVGSJK-VR  
Mco\_cpFBPase2\_XP\_002499881.1 ----PHLRVVEANPLAFVARAAGAIADGTNDVMADGPSAAHERPLFVGSVDDVA  
Mco\_cyFBPase\_XP\_002506051.1 KSPNGKLRLLLYECFPMAFLVEQAGGKATGTQRVLDVCCGTGIHQHPHIMGSEEDVE  
Mpu\_cpFBPase1\_XP\_003056260.1 KNPNGKLRLLLYECAPMSFIAEQAGGKGTGTGRVMDVPESEVHQRVPLFCGSKS-VO  
Mpu\_cpFBPase1\_XP\_003063679.1 SAPEGKARLLYEVAPMGFLAEQAGGLAMADKRVMEVVEQIHRSPMFVGSJK-VR  
Mpu\_cpFBPase2\_XP\_003063661.1 ----PHLRVVEANPLAFIARACGGADGSGAFLNKTVSGVHDRAPVYLGSKREDVE  
Mpu\_cyFBPase\_XP\_003057094.1 KHPDGKLRLLLYECFPMAFLVEQAGGKADGCGRILDIKPTSIHQHQIHLGSEEDVD  
Mne\_cpFBPase1\_XP\_013899573.1 KNANGLKLRLLLYECAPMSMIAEQAGGLGTGTGRVMDIVPTKVHQRVPLFVGSJK-VR  
Olu\_cpFBPase1\_XP\_001416538.1 KNPNGKLRLLLYECAPMSFIAEQAGGMGTGKERVLDVPEKHFQRVPLFCGSKK-VO  
Olu\_cpFBPase2\_XP\_001417955.1 ----PHLRVVEANPLAFVARAAGAADGIRTILDKKPTTLHERSPFLFCGSCEDIA  
Olu\_cpFBPase1\_XP\_001422674.1 SAPNGKARLLYEVAPIAMIAEQAGGMGTGRGRVLDIRPEEVHQRVPLFCGSKS-VO  
Olu\_cyFBPase\_XP\_001419675.1 SNAQKLRVLYECFPMAFLVEQAGGLASGNDVLSFVPTAHSRMPFFHCGSARDIE  
Ota\_cpFBPase1\_XP\_003077945.1 KNPNGKLRLLLYECAPMSMIAEQAGGKGTGVARVLDIVPEKVHQRVPLFCGSKN-VA  
Ota\_cpFBPase2\_XP\_022838959.1 ----PHLRVVEANPLAFVARAAGAADGLVDVLTKKPAELHERSPFLFCGSTEEDIA  
Ota\_cpFBPase1\_XP\_003082905.2 KAKEGKARLLYEVAPIAMIAEQAGGMGTGRGRVLDIRPEEVHQRVPLFCGSKS-VA  
Ota\_cyFBPase\_XP\_003080995.2 KNPNGKLRVLYECFPMAFLVEQAGGKATGTGRVMDVPESEVHQRVPLFCGSKS-VO  
Osp\_cpFBPase1\_54446 KNPNGKLRLLLYECAPMSMICEQAGGKGTGTGRVMDIVPTKVHQRVPLFCGSKN-VD  
Osp\_cpFBPase2\_32079 ----PHLRVVEANPLAFVARACGAADGVDNVLAKTPASLHERAPFFVGSSEEDVA  
Osp\_cpFBPase1\_43222 NAPEGKARLLYEVAPIAMIAEQAGGKATGTGRVMDIVPTKVHQRVPLFCGSKS-VR  
Osp\_cyFBPase\_59046 QNGKLRVLYECFPMAFLVEQAGGKATGTGRVMDIVPTKVHQRVPLFCGSKN-VD  
Psp\_cpFBPase1\_3559 KNPNGKLRLLLYECAPMSFLAEQAGGKGTGFQVRVDIVPEAVHQRVPLFCGSKS-VE  
Psp\_cyFBPase\_XP\_002948170.1 KNVKGKLRLLLYECYPMAYLIEQAGGLADGARRMLDQPPSGIHDRSPISLGSKEDVD  
Vca\_cpFBPase1\_XP\_002948170.1 KNKNKLRLLLYECAPMSFIAEQAGGLGTGTGRVLDVNPPEKVHQRVPLFCGSKK-VE  
Ccr\_cpFBPase1\_XP\_005713305.1 KNPNGKLRLLLYECAPMSFIVEQAGGIATGKDRIMDIIIPNAVHQRVPLFCGSKD-VO  
Ccr\_cyFBPase\_XP\_005712315.1 KSPNGKLRLLLYEAAPMAFLVEQAGGKATGKTEILDIVPEDIHQRVPLFCGSKS-VA  
Cme\_cpFBPase1\_XP\_005537627.1 KNPNGKLRLLLYECAPMAFLVEQAGGIATGKQRIILDIVPRDVHQRVPLFCGSKS-VR  
Cme\_cyFBPase\_XP\_005537806.1 KSKDGKLRLLYEAAPMAFLVEQAGGKATGREDLIDVRPRHQRVPLFCGSAEDIA  
Cme\_cyFBPase\_XP\_005535415.1 AQPQGHKLLLYEAGPLAFVEQAGGRADGR-ALFDRRPTTLHERVPAVMGSEEDVD  
Gsu\_cpFBPase1\_XP\_005703487.1 KNPNGKLRLLLYECAPMSYLIQAGGKANGAQRILDIIIPNTTHERQPLILGSEEDVD  
Gsu\_cpFBPase1\_XP\_005703442.1 KNVSGKLRLLLYECAPMAFLVEQAGGKATGIENILDLTPKDIHERKPLILGSPA-IE  
Gsu\_cyFBPase\_XP\_005707946.1 KNPNGKLRLLLYECAPMAFLVEQAGGKATGTENILDIQPHSIHQRPVFMGSEEDVC  
Gsu\_cyFBPase\_XP\_005709391.1 QWPNGKLRLLLYEASPLAFIIEQAGGKATAL-RILDITPGSVHQRVPLFCGSKS-VE  
Pum\_cpFBPase1\_OSX71660.1 KNVNGKLRLLLYECAPMSFLIEQAGGIATGKERVLDIVPSSVHQRVPLVLSGSPA-VO  
Pum\_cpFBPase1\_OSX75977.1 KNPNGKLRLLLYECAPMSFLVEQAGGMSTGKERVLDIVPNAVHQRVPLILGSPAD-VO  
Pum\_cyFBPase\_OSX71615.1 KSPDGKLRLLLYEAAPMAFLIHHAGGKSTGKEDILDVPTGIHQRPVFMGSEEDVA  
Pum\_cyFBPase\_Pum0654s0006.1.p GRPMGRLLLYEAGPLAFVAEQAGGEATGR-PILDIQPESVHRRVPIILGSEEDVS  
Pum\_cyFBPase\_Pum0229s0029.1.p ARPQGRFKLLLYEAGPLAFVVEKAGGQATGT-AILDIQPESLHRRVVEVMGSEEDIN  
Ppu\_cpFBPase2\_contig\_3490.10 ----HLRLVVEANPLAFIAEQAHGRGDGKRRILEIQPAALHQRPLFLGSPDDIL  
Ppu\_cpFBPase1\_contig\_3540.6 KNKTGKLRLLLYEAAPMSHIIIEQAGGVSTGTERIMDLNPQAVHQRVPLVLSGSKN-VN  
Ppu\_cyFBPase\_contig\_3402.5 KTANGKLRLLLYEAAPMAMLLNAGGAASAKRILDIVPSSIHQRVPLVLSGSKN-VN  
Mpo\_cpFBPase2\_Mapoly0066s0105. ----HLRLVVEANPLSYLVEQAGGKGDGKRRILDIEPTKLHERLPLFLGSPDDIL  
Mpo\_cpFBPase1\_Mapoly0047s0030. KSKNGKLRLLLYECAPMSYLAEQAGGKGDGRRVLEIEPEQVHQRVPLVLSGSTE-VE  
Mpo\_cyFBPase\_Mapoly0005s0291.1 KSPNGKLRVLYEVFPMSFLVEQAGGQATGKQRALELVPTKIHERSPIFLGSYDDVE  
Mpo\_cyFBPase\_Mapoly0005s0291.2 KSPNGKLRVLYEVFPMSFLVEQAGGQATGKQRALELVPTKIHERSPIFLGSYDDVE  
Ppa\_cpFBPase2\_Pp3c18\_4950V3.1 ----HLRLVVEANPLSYLVEQAGGKGDGKRRILEINPVEIHLRPLFLGSAADIA  
Ppa\_cpFBPase2\_Pp3c22\_22950V3.1 ----HSRLVVEANPLSYLVEQAGGKGDGKRRILEINPVEIHLRPLFLGSAADVA  
Ppa\_cpFBPase2\_Pp3c24\_11070V3.1 ----OLHLIHEANAVSFLVENGGQADGRRRILEIQPTHLHQRVPLVLSGSAADVS  
Ppa\_cpFBPase1\_Pp3c19\_12890V3.1 KSKNGKLRLLLYECAPMSYLAEQAGGKGDGHRILDIQPEQVHQRVPLVLSGSTE-VE  
Ppa\_cpFBPase1\_Pp3c7\_15760V3.1 KSKNGKLRLLLYECAPMSYLAEQAGGKGDGHRILDIQPEQVHQRVPLVLSGSTE-VE  
Ppa\_cyFBPase\_Pp3c3\_1090V3.1.p KSPKGLRVLYEVFPMSFLVEQAGGQSTGKQRALELVPAHIHQRVPLVLSGSTE-VE  
Ppa\_cyFBPase\_Pp3c13\_1900V3.1.p KSPKGLRVLYEVFPMSFLVEQAGGQSTGKQRALELVPAHIHQRVPLVLSGSTE-VE  
Smo\_cpFBPase2\_D8RVB3 ----HLRLVVEANPLGFLMEDAGGKADGKRRILDIEQVELHQRVPLVLSGSEEDVL  
Smo\_cpFBPase1\_D8RW89 KSKNGKLRLLLYECAPMSFLVEQAGGKGDGSRILDIKPEQVHQRVPLVLSGSTE-VE  
Smo\_cyFBPase\_D8RRD1 KSPNGKLRLLLYEVFPMAFLVEQAGGQATGKERALDVVPPKIHERSPIFLGSFEDVE  
Smo\_cyFBPase\_D8SBY7 KSPFGKLRVLYEVFPMSYLVVEQAGGQATGKERALDVVPPKIHERSPIFLGSYDDVE  
Smo\_cyFBPase\_D8QTD0 KSPFGKLRVLYEVFPMSYLVVEQAGGQATGKERALDVVPPKIHERSPIFLGSYDDVE  
Ath\_cpFBPase2\_NP\_201243.1 ----HLRLVVEANPLAFIIEQAGGKSDGKRGILSIQPVKHLQRVPLVLSGLEDVA  
Ath\_cpFBPase1\_NP\_001190083.1 KSKNGKLRLLLYECAPMSFIVEQAGGKGDGHSRVLDIQPTTEIHRVPLVLSGSTE-VE  
Ath\_cyFBPase\_NP\_175032.1 KSPNGKLRVLYEVFPMSFLVEQAGGQATGKRRALDVPEKIHERSPIFLGSYDDVE  
Fan\_cyFBPase\_ABW38332.1 KSPNGKLRVLYEVFPMSFLVEQAGGQATGKERALDVVPPKIHERSPIFLGSYDDVE  
Fan\_cpFBPase1\_ABW38330.1 KSKNGKLRLLLYECAPMSFIVEQAGGKGDGHSRVLDIQPTTEIHRVPLVLSGSTE-VE  
Fan\_cpFBPase2\_ABW38331.1 ----HLRLVVEANPLSYLVEQAGGKGDGKRRILSIQPKLHQRVPLVLSGLEDMD  
Dvu\_FBPhaseI\_A1VD23 RHPDGKLRLLLYEASPLAFIIEQAGGQATGKERALDVVPPKIHERSPIFLGSARDVD  
Ava\_FBPhaseI\_Q3MCI4 ONPEGKLRLLLYEASPLAFIIEQAGGQATGKERALDVVPPKIHERSPIFLGSARDVD  
ruler .....210.....220.....230.....240.....250.....
