# Supplementary material for: The ubiquity and coexistence of two FBPases in chloroplasts of photosynthetic eukaryotes and its evolutionary and functional implications
Source: PubMed Central journal article supplement — Plant Divers. 2019 Sep 26;42(2):120–5. doi: 10.1016/j.pld.2019.09.002 (PMC7195585; doi:10.1016/j.pld.2019.09.002), 2019-09-26
Supplement: mmc3.pdf [file mmc3.pdf]

Dvu\_cyFBPase1\_ALVD23 HL-DFLLNDLVLSAKIISRSVLLV... KLEB-ANRVL-Y-RMER-SGACAMASEENADII... PEKLRHGDYVL-FDPLDGSNIDVNI... V... CI-D-D-V-L-OPGYEQVAAGYLYL... GSP... TMLVFT

Dvu FBpase1\_ALVD23 GQGVHGFLLDPVSGEFLLSHPDMSIP-RGIYSINSESYWWD-PREVYSFKYSLRYSGLVADFHRTLLYGGIFMYPMDY-RH-P-DKPK-QKLRMLCEASPLAFIABJAGGRAIDG-S-RR-ILD-V-CP-GT-LHB-RI

Dvu\_FBpaseI\_A1VD23 ----- PLFIGSAR DVA K-VEE IY A RH ----- RA  
 Ava\_FBpaseI\_Q3MCI4 ----- FLIIGSKE DVA K-VEE F I QN ----- GH  
 Bna\_cyFBpase\_92362 ----- PFFCGSIE DMN E-LE K-A Y LS ----- A AK-----T-----A  
 Gsu\_cyFBpase\_XP\_005709391.1 ----- QVVMGSYE DVE LVE QL F KGPRSDPM YLL ----- RR-----SHSIEEMKDSKEESTSFN ----- KDEDGPTILCST-----LPRL-----A  
 Cme\_cyFBpase\_XP\_005535415.1 ----- PAVMGSVN DVE LLE QL L AKIDRDFM FLLRSVSV ----- TQA ----- DEWCARSRLS-DRVQA-----PWSPLQIVGG-----VLAS-----VPP  
 Pum\_cyFBpase\_Pum02290029.1.p ----- EVMVGSDE DIN LCT SH F ----- RK ----- WGR-----GPSADP-----MYSLRRSKS-IDA-QMK-----AG-----E-----EGDGGPLV-----NSP-----SIGAG-G  
 Pum\_cyFBpase\_Pum06540006.1.p ----- PIIILGSED DVS LCA SH F ----- RT ----- WGS-----GPKSDPMAMLR-----RH-----HSIDA-CLR-----RSSGARSVGSFGGRSPTRG-----VTIIDE  
 Cme\_cyFBpase\_XP\_005537806.1 ----- PVFMGSABE DIE E-FL E I A S ----- S ----- K-----FQ  
 Gsu\_cyFBpase\_XP\_005707946.1 ----- PVFMGSYE DVC D-L E SF C ----- C-----K-----SA  
 Pum\_cyFBpase\_OSX71615.1 ----- PVMVGSPE DVA D-F E AV S ----- T-----K-----LA-----N  
 Ccr\_cyFBpase\_XP\_005712315.1 ----- PVMVGSSE DIA D-F E AL A ----- S-----K-----Y  
 Ppu\_cyFBpase\_contig\_3402.5 ----- PVFMGSYN DIN Y-IN E L Y ----- H-----P-----G  
 Ota\_cyFBpase\_XP\_003080995.2 ----- PIHVGSFA DIE R-LS QMY ----- RE-----S-----PG-----G  
 Olu\_cyFBpase\_XP\_001419675.1 ----- PFHCGSAR DIE R-LD E I L ----- SS-----VR-----A  
 Osp\_cyFBpase\_59046 ----- PIHLGSAR DVE R-LS R-M L ----- AA-----E-----VE-----H-----T  
 Bpr\_cyFBpase\_XP\_007510822.1 ----- IHLGSKE NMD D-LK K-CL ----- R-----R-----E-AAA-----D-----P  
 Mco\_cyFBpase\_XP\_002506051.1 ----- PIHMGSEE DVE E-ID R-F Y ----- R-----R-----E-AAA-----D-----P  
 Mpu\_cyFBpase\_XP\_003057094.1 ----- GHILGSVE DVD E-IE E-C M ----- K-----N-AR-----R-----A  
 Cpa\_cyFBpase\_Contig11350-abini -----  
 Ath\_cyFBpase\_NP\_175032.1 ----- PIFLGSYD DVE E-IK A-L Y ----- A-----A-----E-----E-----E  
 Fan\_cyFBpase\_ABW38332.1 ----- PIFLGSYD DVE E-IK A-L Y ----- A-----A-----E-----E-----E  
 Mpo\_cyFBpase\_Mapoly0005s0291.2 ----- PIFLGSYD DVE E-VK D-L Y ----- A-----A-----Y-----Y-----Y  
 Mpo\_cyFBpase\_Mapoly0005s0291.1 ----- PIFLGSYD DVE E-VK D-L Y ----- A-----A-----Y-----Y-----Y  
 Ppa\_cyFBpase\_Pp3c3\_1090V3.1.p ----- PIFLGSYD DVE E-IK A-L Y ----- A-----A-----E-----S-----S  
 Ppa\_cyFBpase\_Pp3c13\_1900V3.1.p ----- PIFLGSYD DVE E-IK A-L Y ----- A-----A-----E-----S-----S  
 Smo\_cyFBpase\_D8RRD1 ----- PIFLGSFE DVE E-IK T-L Y ----- H-----A-----S-----G  
 Smo\_cyFBpase\_D8SBY7 ----- PIFLGSYD DVE E-IK K-L Y ----- S-----A-----T-----I  
 Smo\_cyFBpase\_D8QTD0 ----- PIFLGSYD DVE E-IK K-L Y ----- S-----A-----T-----I  
 Apr\_cyFBpase\_XP\_011400401.1 ----- PIVLGSCE DVD D-IE R-H Y ----- K-----E-----Q-----G  
 Psp\_cyFBpase\_XP\_002948170.1 ----- PISLGSKE DVD R-LL E-I M ----- K-----E-----E-----G  
 Cva\_cyFBpase\_XP\_005845821.1 ----- PIYLGSK E E L-IE M-F K ----- K-----E-----E-----G  
 Csol1228\_cyFBpase\_CSI\_122800009 ----- GCK ----- RE-----M-----G  
 Csol1230\_cyFBpase\_CSI2\_12300000 ----- QAA R-C ----- K-----C-----G  
 Csol1412\_cyFBpase\_CSJ00003447-R ----- PIVLGSKE E E E-IE R L ----- K-----KE-----C-----G  
 Bna\_cyFBpase\_85805 ----- PVILGCKR DVE P-VL AGYE G YSDA T N I S I K ----- S-----S-----NS-----SG-----L  
 Egr\_cyFBpase\_ABF68600.1 ----- PVILGGER DVK L-VL S-K Y ----- K-----E-----L-----G  
 Egr\_cyFBpase\_BAU20292.1 ----- PVILGGER DVK L-VL S-K Y ----- K-----E-----L-----G  
 Ptr\_cyFBpase\_23247 ----- PIIMGKGR DVQ V-VF D-Q Y ----- K-----K-----A-----GI-----D  
 Toc\_cyFBpase\_EJK72926.1 ----- PIIMGHR DVG V-VY D-C Y ----- K-----K-----A-----GI-----D  
 Esi\_cpFBpase2\_CBN75354.1 ----- PAFFGSPD -----DLLL-LL-D-PR-YLHSKKK ----- Q-----VS-----T  
 Ptr\_cpFBpase2\_31994 ----- PIFLGSIE NVFELDQ F YK-YY-SDDDNKE Q ----- Q-----VS-----T  
 Toc\_cpFBpase2\_EJK67142.1 ----- PIFLGSVE NVFELDQ F YK-YY-GDD ----- Q-----VS-----T  
 Esi\_cpFBpase2\_CBN77737.1 ----- GLFLGSEE DIL E-LE R A ----- L ----- EAGSRAE REAAAEAAAE-AEAEAAEKAKAEAAAAAEEKEKEEEEEEEEEEEKE--EETIEPEAVAE--AVAVAEAPVDAEASMEEGASPGV--VEDEGGEPAL-----GGEDDDHEPVVVAQK-D  
 Egr\_cpFBpase2\_BAU20291.1 ----- PLFAGSAA DVA E-LE S-YGDVC G G ----- A-----A-----Q  
 Bna\_cpFBpase2\_38456 ----- PVFLGSSE DIE E-LE S-YGDVC G G ----- A-----A-----Q  
 Ppu\_cpFBpase2\_contig\_3490.10 ----- PLFLGSSD DLN E-LE K-YD-VC G K ----- D-----G  
 Bpr\_cpFBpase2\_XP\_007512791.1 ----- PLFAGSSE DIA E-IE K-YENVK G T ----- E-----G  
 Mpu\_cpFBpase2\_XP\_003063661.1 ----- PLFIGSRE DVE E-VT S-YAAYG V T Q ----- AA-----T  
 Mco\_cpFBpase2\_XP\_002499881.1 ----- PLFVGSVD DVA E-LL T-YGDVR G V ----- A-----A-----K  
 Osp\_cpFBpase2\_32079 ----- PFFVGSSE DVA E-LV S-RGDVC G D ----- AS-----K  
 Olu\_cpFBpase2\_XP\_001417955.1 ----- PLFLGSCE DIA E-LV L-RGDVR G D ----- GS-----K  
 Ota\_cpFBpase2\_XP\_022838959.1 ----- PLFLGSSE DIA E-LV R-RGDVR G D ----- DS-----K  
 Mpo\_cpFBpase2\_Mapoly0066s0105 ----- PLFLGSPE DIL E-LE S-YGDVC G L ----- VN-----P  
 Smo\_cpFBpase2\_D8RVB3 ----- PLFLGSSE DVL E-LE T-YGDVC G V ----- VN-----P  
 Ppa\_cpFBpase2\_Pp3c18\_4950V3.1 ----- PLFLGSAA DIA E-LV S-YGDIC G E ----- KN-----P  
 Ppa\_cpFBpase2\_Pp3c22\_22950V3.1 ----- PLFLGSAA DVA E-LV S-YGDIC G Q ----- TS-----P  
 Ppa\_cpFBpase2\_Pp3c24\_11070V3.1 ----- PLFLGSAA DVS E-LE A-YGDIC G V ----- FD-----P  
 Fan\_cpFBpase2\_ABW38331.1 ----- PLFLGSLE DMD E-LE S-YGDVC G K ----- VN-----P  
 Ath\_cpFBpase2\_NP\_201243.1 ----- PLFLGSLE DVA E-LE S-YGDVC G T ----- VN-----P  
 Czo\_cpFBpase2\_Cz01g04250.t1 ----- PLFLGSPE DIA E-LE S-YGDVC G L ----- SG-----K  
 Cme\_cpFBpase1\_XP\_005537627.1 ----- PICGSPR DVE D-L L-K I Y ----- L-----Q-----SM  
 Gsu\_cpFBpase1\_XP\_005703487.1 ----- LILGSSE DVD E-LM Q-VY ----- G-----TK-----Y  
 Gsu\_cpFBpase1\_XP\_005703442.1 ----- LILGSPA DIE E-FL Q-VY ----- G-----MSRVDR-----ED-----MHM  
 Pum\_cpFBpase1\_OSX71660.1 ----- LVLGSPE DVQ E-LL D-K Y ----- Y-----EA-----D  
 Pum\_cpFBpase1\_OSX75977.1 ----- LILGSAD DVQ E-LL D-M Y ----- A-----S-----H  
 Ccr\_cpFBpase1\_XP\_005713305.1 ----- LIIGSKD DVQ E-LV D-M Y ----- A-----AA-----E  
 Ppu\_cpFBpase1\_contig\_3540.6 ----- VILGSKN LVN EV-V E-A-Y ----- K-----Q-----A  
 Esi\_cpFBpase1\_CBN74703.1 ----- IYLGSAE DVT E-LI N-A ----- L-----KK-----EK  
 Esi\_cpFBpase1\_CBN76290.1 ----- IYLGSAE DVT E-LI N-A ----- L-----KK-----EK  
 Ptr\_cpFBpase1\_2793 ----- PCFIGSYD DVS E-W ----- E-----W  
 Toc\_cpFBpase1\_EJK50041.1 ----- PCFMGSDD DMD E-LA G-Y ----- L ----- RG  
 Ptr\_cpFBpase1\_9359 ----- IIMGSRQ DV E-VM DAYK N-FG ----- T-----I  
 Ptr\_cpFBpase1\_8744 ----- VIMGSKN DVL EV-I D-A-Y ----- E-----AAS-----N  
 Egr\_cpFBpase1\_ABF68597.1 ----- LMLGAD EM DE-LI E-L-Y ----- N-----AKA-----DA-----ALK-----KSQ  
 Bna\_cpFBpase1\_51585 ----- VFIGSPD DVD E-V E-K-A ----- L-----A-----A  
 Cpa\_cpFBpase1\_Contig53396-snap ----- PFLGSKK CVE L-L E-N-Y ----- Y-----AG-----K-----A  
 Mco\_cpFBpase1\_XP\_002505568.1 ----- PFIYGSRE E VQ Y-L E-S-F ----- L-----QE-----R  
 Mco\_cpFBpase1\_XP\_002505565.1 ----- PMFVGSK M VR E-L E-E-F ----- L-----ED-----R-----AF  
 Mpu\_cpFBpase1\_XP\_003056260.1 ----- PFIYGSRE E VQ Y-L E-S-F ----- L-----VE-----E-----K  
 Mpu\_cpFBpase1\_XP\_003063679.1 ----- PMFVGSK M VE G-L E-K-F ----- L-----VE-----E-----K  
 Bpr\_cpFBpase1\_XP\_007509936.1 ----- PMFVGSNS A VL G-L E-K-F ----- L-----KE-----R  
 Osp\_cpFBpase1\_43222 ----- PMFVGSAS A VR D-L G-E-F ----- L-----KS  
 Olu\_cpFBpase1\_XP\_001422674.1 ----- PMFVGSKS-AVQDLQ EFL K-K ----- K-----K  
 Ota\_cpFBpase1\_XP\_003082905.2 ----- PMFVGSAS A VK D-L G-A-F ----- L-----K  
 Olu\_cpFBpase1\_XP\_001416538.1 ----- PFFVGSKK E VQ Y-L E-S-F ----- L-----K  
 Ota\_cpFBpase1\_XP\_003077945.1 ----- PFFVGSKN E VA Y-L E-S-F ----- L-----K  
 Osp\_cpFBpase1\_54446 ----- PFFVGSKN E VD Y-L E-S-F ----- L-----K  
 Bpr\_cpFBpase1\_XP\_007509205.1 ----- PFFVGSVE E VA Y-L E-S-F ----- M-----K  
 Apr\_cpFBpase1\_XP\_011398191.1 ----- PLFVGSSE E VE Y-L E-S-F ----- F-----L  
 Psp\_cpFBpase1\_3559 ----- PLFVGSSE E VE Y-L E-S-F ----- L-----L  
 Cva\_cpFBpase1\_XP\_005848342.1 ----- PLFVGSSE E VE Y-L E-S-F ----- L-----L  
 Csol1228\_cpFBpase1\_CSI\_12280000 ----- P-----TKWE-----VE-----C-----E-----E  
 Csol1230\_cpFBpase1\_CSI2\_12300000 ----- PLFVGSSE E VE Y-L E-S-V ----- L-----Q-----N-----K-----PA  
 Csol1412\_cpFBpase1\_CSJ00005697 ----- PLFVGSSE E VE Y-L E-S-V ----- L-----Q-----N-----K-----PA  
 Cre\_cpFBpase1\_XP\_001690872.1 ----- PLFVGSSE E VE Y-L E-S-F ----- L-----K  
 Vca\_cpFBpase1\_XP\_002948170.1 ----- PLFVGSSE E VE Y-L E-S-F ----- L-----K  
 Dsa\_cpFBpase1\_Dusal.0106s00008 ----- PLFVGSSE E VE L-L E-H-F ----- V-----AG-----K-----R  
 Czo\_cpFBpase1\_Cz04g03070.t1 ----- PLFVGSSE E VE Y-L E-S-F ----- L-----K  
 Mne\_cpFBpase1\_XP\_013899573.1 ----- PLFVGSSE E VR Y-L E-S-F ----- L-----K-----A-----Q  
 Smo\_cpFBpase1\_D8RW89 ----- PLYVGSSE E VE K-L E-K-Y ----- L-----SS  
 Ppa\_cpFBpase1\_Pp3c7\_15760V3.1 ----- PLYVGSSE E VE K-L E-K-Y ----- L-----S  
 Ppa\_cpFBpase1\_Pp3c19\_12890V3.1 ----- PLYVGSSE E VE K-L E-S-F ----- L-----S  
 Mpo\_cpFBpase1\_Mapoly0047s0030 ----- PLFVGSSE E VE K-L E-K-Y ----- L-----A  
 Ath\_cpFBpase1\_NP\_001190083.1 ----- PLYVGSSE E VE K-L E-K-Y ----- L-----A  
 Fan\_cpFBpase1\_ABW38330.1 ----- PLYVGSSE E VE K-L E-K-Y ----- L-----A  
 ruler ..... 410 ..... 420 ..... 430 ..... 440 ..... 450 ..... 460 ..... 470 ..... 480 ..... 490 ..... 500 ..... 510 ..... 520 ..... 530 ..... 540 ..... 550 ..... 560 ..... 570 ..... 580 ..... 590 ..... 600

Dvu\_FBpaseI\_A1VD23 -----  
Ava\_FBpaseI\_Q3MCI4 -----  
Bna\_cyFBpase\_92362 -----GGKIPQSK-L-----  
Gsu\_cyFBpase\_XP\_005709391.1 -----QYNE-----  
Cme\_cyFBpase\_XP\_005535415.1 -----F-----LLEDS-----  
Pum\_cyFBpase\_Pum0229s0029.1.p EDGF-----V-CAYL-----FVV-----  
Pum\_cyFBpase\_Pum0654s0006.1.p IDGFVCAHL-----FV-----L-----  
Cme\_cyFBpase\_XP\_005537806.1 -----  
Gsu\_cyFBpase\_XP\_005707946.1 -----S-----  
Pum\_cyFBpase\_OSX71615.1 -----S-V-----  
Ccr\_cyFBpase\_XP\_005712315.1 -----A-----  
Ppu\_cyFBpase\_contig\_3402.5 -----K-----  
Ota\_cyFBpase\_XP\_003080995.2 -----AAAVRSTFS-----L-----  
Olu\_cyFBpase\_XP\_001419675.1 -----G-KKGRVSSPSPR-----  
Osp\_cyFBpase\_59046 -----FN-----N-----  
Bpr\_cyFBpase\_XP\_007510822.1 -----L-----  
Mco\_cyFBpase\_XP\_002506051.1 -----D-A-----R-----  
Mpu\_cyFBpase\_XP\_003057094.1 -----S-W-DQSR-----G-----  
Cpa\_cyFBpase\_Contig11350-abini -----  
Ath\_cyFBpase\_NP\_175032.1 -----K-----K-----N-----  
Fan\_cyFBpase\_ABW38332.1 -----K-----K-----E-----  
Mpo\_cyFBpase\_Mapoly0005s0291.2 -----S-----  
Mpo\_cyFBpase\_Mapoly0005s0291.1 -----S-----  
Ppa\_cyFBpase\_Pp3c3\_1090V3.1.p -----A-----  
Ppa\_cyFBpase\_Pp3c13\_1900V3.1.p -----A-----  
Smo\_cyFBpase\_D8RRD1 -----L-----L-----  
Smo\_cyFBpase\_D8SBY7 -----A-----  
Smo\_cyFBpase\_D8QTD0 -----A-----  
Apr\_cyFBpase\_XP\_011400401.1 -----L-----  
Psp\_cyFBpase\_XP\_002948170.1 -----L-----L-----A-----  
Cva\_cyFBpase\_XP\_005845821.1 -----A-----Q-----  
Csol1228\_cyFBpase\_CSI\_122800009 -----  
Csol1230\_cyFBpase\_CSI2\_12300000 -----  
Csol1412\_cyFBpase\_CSJ00003447-R -----C-----Q-----  
Bna\_cyFBpase\_85805 -----K-S-----K-----L-----  
Egr\_cyFBpase\_ABF68600.1 -----LA-----A-----  
Egr\_cyFBpase\_BAU20292.1 -----LA-----A-----  
Ptr\_cyFBpase\_23247 -----G-----P-----T-----L-----  
Toc\_cyFBpase\_EJK72926.1 -----V-----PD-----L-----K-----KD-----D-----  
Esi\_cpFBpase2\_CBN75354.1 -----R-----  
Ptr\_cpFBpase2\_31994 -----AKQ-----V-----  
Toc\_cpFBpase2\_EJK67142.1 -----E-----  
Esi\_cpFBpase2\_CBN77737.1 GGTE-----NEE-----VAA-----  
Egr\_cpFBpase2\_BAU20291.1 -----K-----D-----  
Bna\_cpFBpase2\_38456 -----NVE-----A-----  
Ppu\_cpFBpase2\_contig\_3490.10 -----S-----D-----V-----  
Bpr\_cpFBpase2\_XP\_007512791.1 -----G-----Y-----K-----I-----  
Mpu\_cpFBpase2\_XP\_003063661.1 -----E-----V-----  
Mco\_cpFBpase2\_XP\_002499881.1 -----T-----V-----A-----L-----  
Osp\_cpFBpase2\_32079 -----T-----V-----  
Olu\_cpFBpase2\_XP\_001417955.1 -----T-----V-----  
Ota\_cpFBpase2\_XP\_022838959.1 -----T-----V-----  
Mpo\_cpFBpase2\_Mapoly0066s0105 -----G-----V-----  
Smo\_cpFBpase2\_D8RVB3 -----G-----V-----  
Ppa\_cpFBpase2\_Pp3c18\_4950V3.1 -----G-----V-----  
Ppa\_cpFBpase2\_Pp3c22\_22950V3.1 -----E-----V-----  
Ppa\_cpFBpase2\_Pp3c24\_11070V3.1 -----E-----SDDDG-----V-----  
Fan\_cpFBpase2\_ABW38331.1 -----G-----V-----  
Ath\_cpFBpase2\_NP\_201243.1 -----G-----V-----  
Czo\_cpFBpase2\_Cz01g04250.t1 -----T-----V-----  
Cme\_cpFBpase1\_XP\_005537627.1 -----A-----M-----R-----G-----  
Gsu\_cpFBpase1\_XP\_005703487.1 -----SS-----Q-----MQ-----V-----  
Gsu\_cpFBpase1\_XP\_005703442.1 -----W-----DN-----L-----SS-----L-----  
Pum\_cpFBpase1\_OSX71660.1 -----Q-----  
Pum\_cpFBpase1\_OSX75977.1 -----E-----  
Ccr\_cpFBpase1\_XP\_005713305.1 -----E-----  
Ppu\_cpFBpase1\_contig\_3540.6 -----K-----  
Esi\_cpFBpase1\_CBN74703.1 -----A-----E-----  
Esi\_cpFBpase1\_CBN76290.1 -----A-----E-----  
Ptr\_cpFBpase1\_2793 -----  
Toc\_cpFBpase1\_EJK50041.1 -----E-----  
Ptr\_cpFBpase1\_9359 -----E-----  
Ptr\_cpFBpase1\_8744 -----E-----  
Egr\_cpFBpase1\_ABF68597.1 -----LDRLA-----V-----  
Bna\_cpFBpase1\_51585 -----  
Cpa\_cpFBpase1\_Contig53396-snap -----  
Mco\_cpFBpase1\_XP\_002505568.1 -----A-----  
Mco\_cpFBpase1\_XP\_002505565.1 -----V-----YRNGPRDEL-----  
Mpu\_cpFBpase1\_XP\_003056260.1 -----A-----  
Mpu\_cpFBpase1\_XP\_003063679.1 -----ARATVKA-----  
Bpr\_cpFBpase1\_XP\_007509936.1 -----H-----  
Osp\_cpFBpase1\_43222 -----K-----  
Olu\_cpFBpase1\_XP\_001422674.1 -----Y-----  
Ota\_cpFBpase1\_XP\_003082905.2 -----K-----  
Olu\_cpFBpase1\_XP\_001416538.1 -----M-----  
Ota\_cpFBpase1\_XP\_003077945.1 -----M-----  
Osp\_cpFBpase1\_54446 -----M-----  
Bpr\_cpFBpase1\_XP\_007509205.1 -----K-----  
Apr\_cpFBpase1\_XP\_011398191.1 -----K-----  
Psp\_cpFBpase1\_3559 -----N-----  
Cva\_cpFBpase1\_XP\_005848342.1 -----P-----K-----  
Csol1228\_cpFBpase1\_CSI\_12280000 -----  
Csol1230\_cpFBpase1\_CSI2\_12300000 -----P-----Q-----  
Csol1412\_cpFBpase1\_CSJ00005697- -----P-----Q-----  
Cre\_cpFBpase1\_XP\_001690872.1 -----H-----  
Vca\_cpFBpase1\_XP\_002948170.1 -----H-----  
Dsa\_cpFBpase1\_Dusa1.0106s00008 -----M-----  
Czo\_cpFBpase1\_Cz04g03070.t1 -----Q-----  
Mne\_cpFBpase1\_XP\_013899573.1 -----A-----  
Smo\_cpFBpase1\_D8RW89 -----M-----  
Ppa\_cpFBpase1\_Pp3c7\_15760V3.1 -----A-----  
Ppa\_cpFBpase1\_Pp3c19\_12890V3.1 -----S-----  
Mpo\_cpFBpase1\_Mapoly0047s0030 -----A-----  
Ath\_cpFBpase1\_NP\_001190083.1 -----  
Fan\_cpFBpase1\_ABW38330.1 -----  
ruler .....610.....620.....630.
