# Supplementary figures and images for: The ubiquity and coexistence of two FBPases in chloroplasts of photosynthetic eukaryotes and its evolutionary and functional implications
Source: PubMed Central journal article supplement — Plant Divers. 2019 Sep 26;42(2):120–5. doi: 10.1016/j.pld.2019.09.002 (PMC7195585; doi:10.1016/j.pld.2019.09.002), 2019-09-26

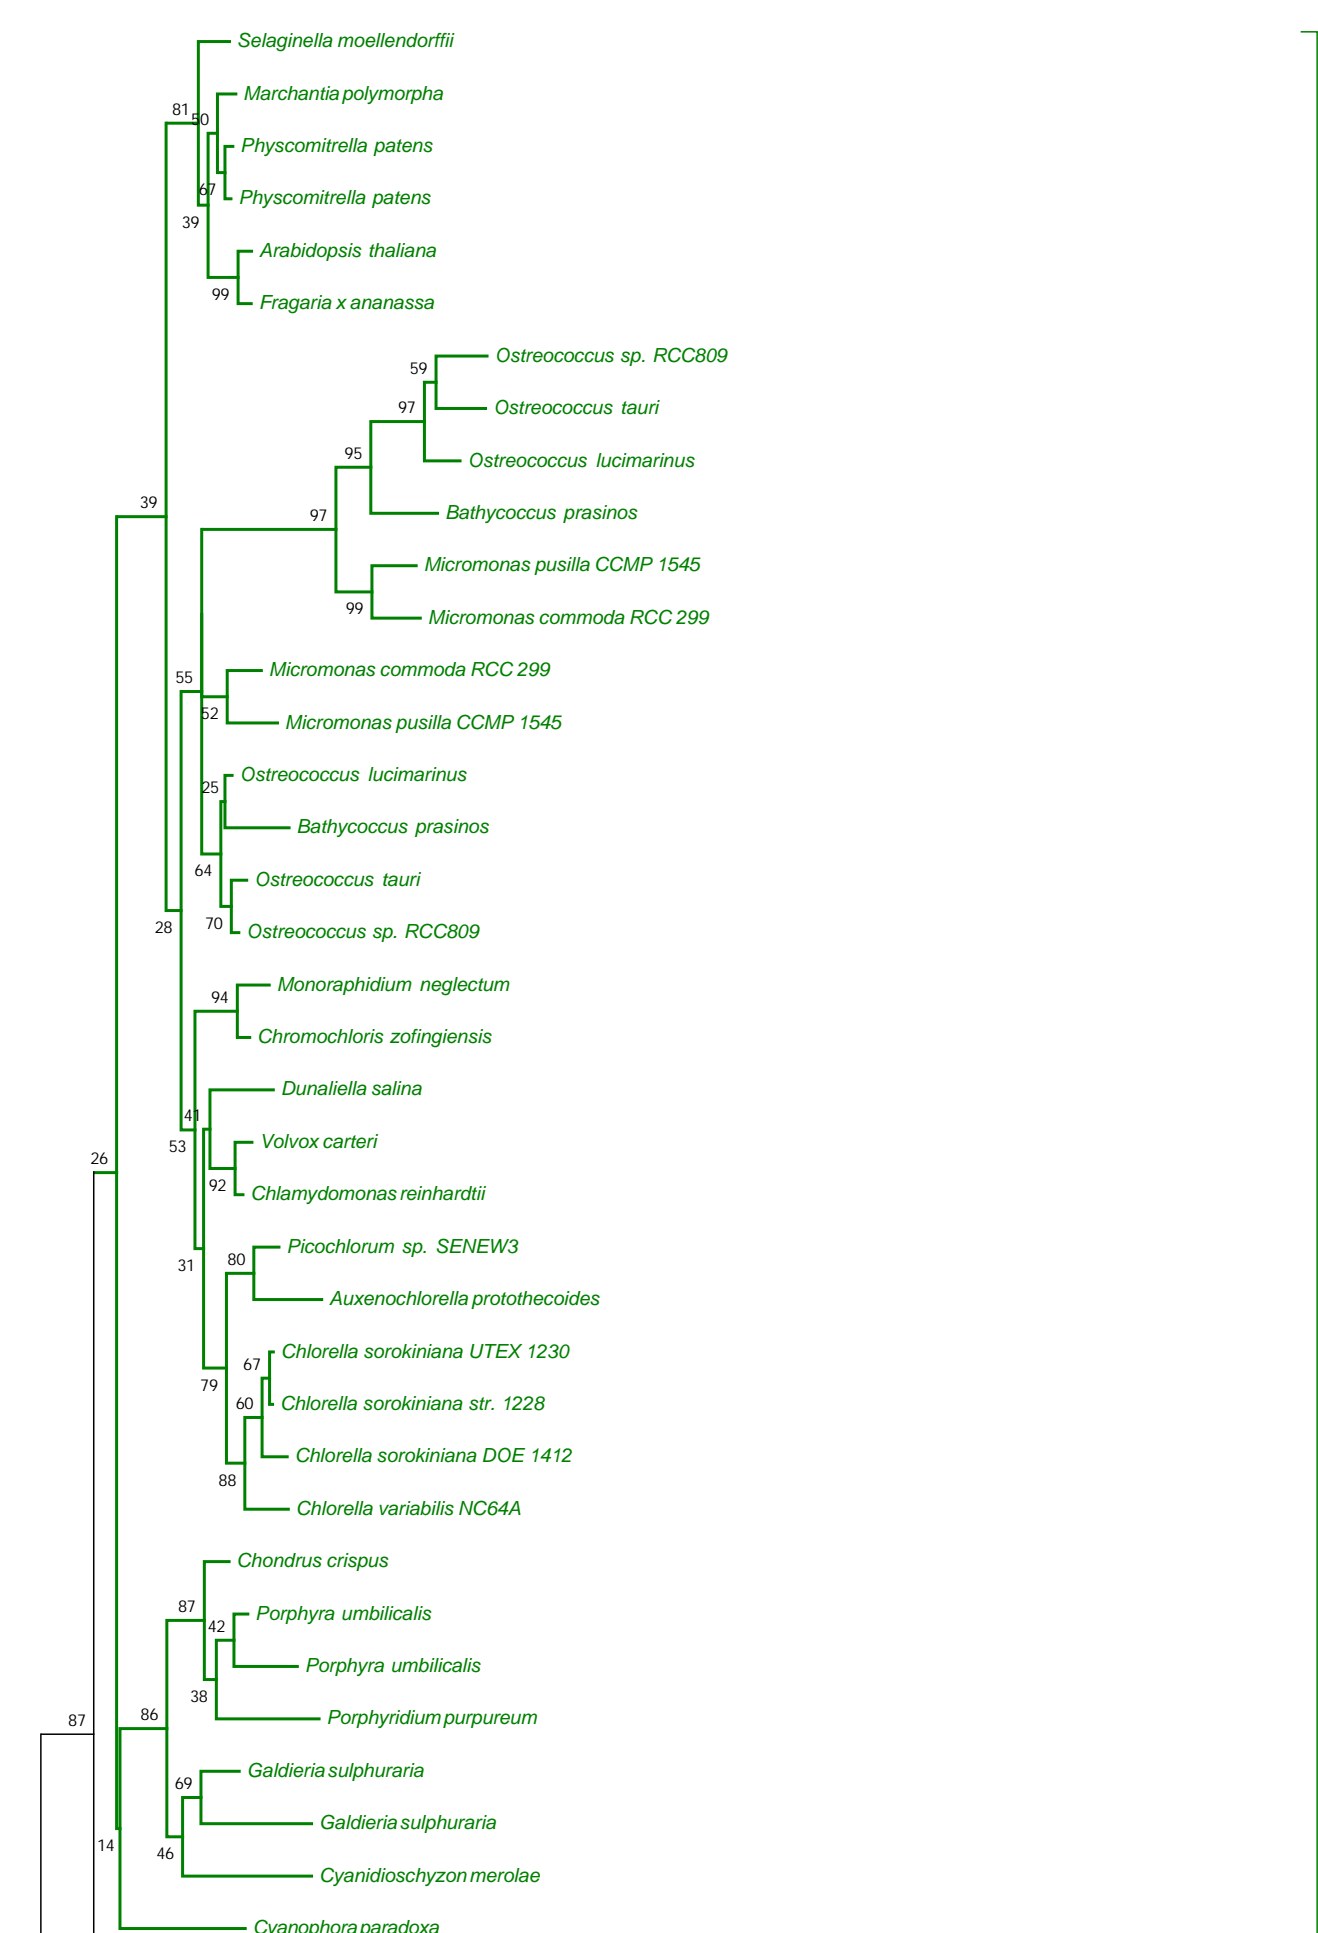

cpFBPase1

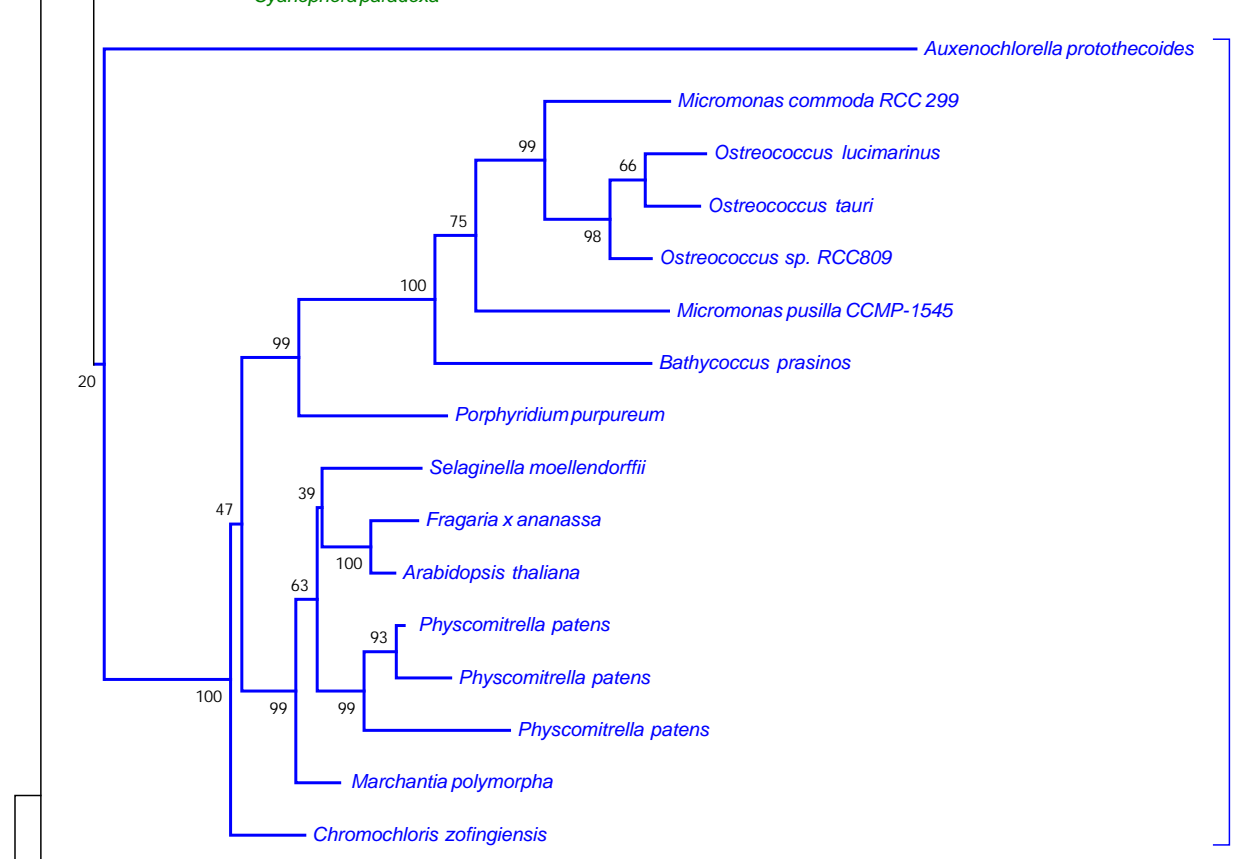

cpFBPase2

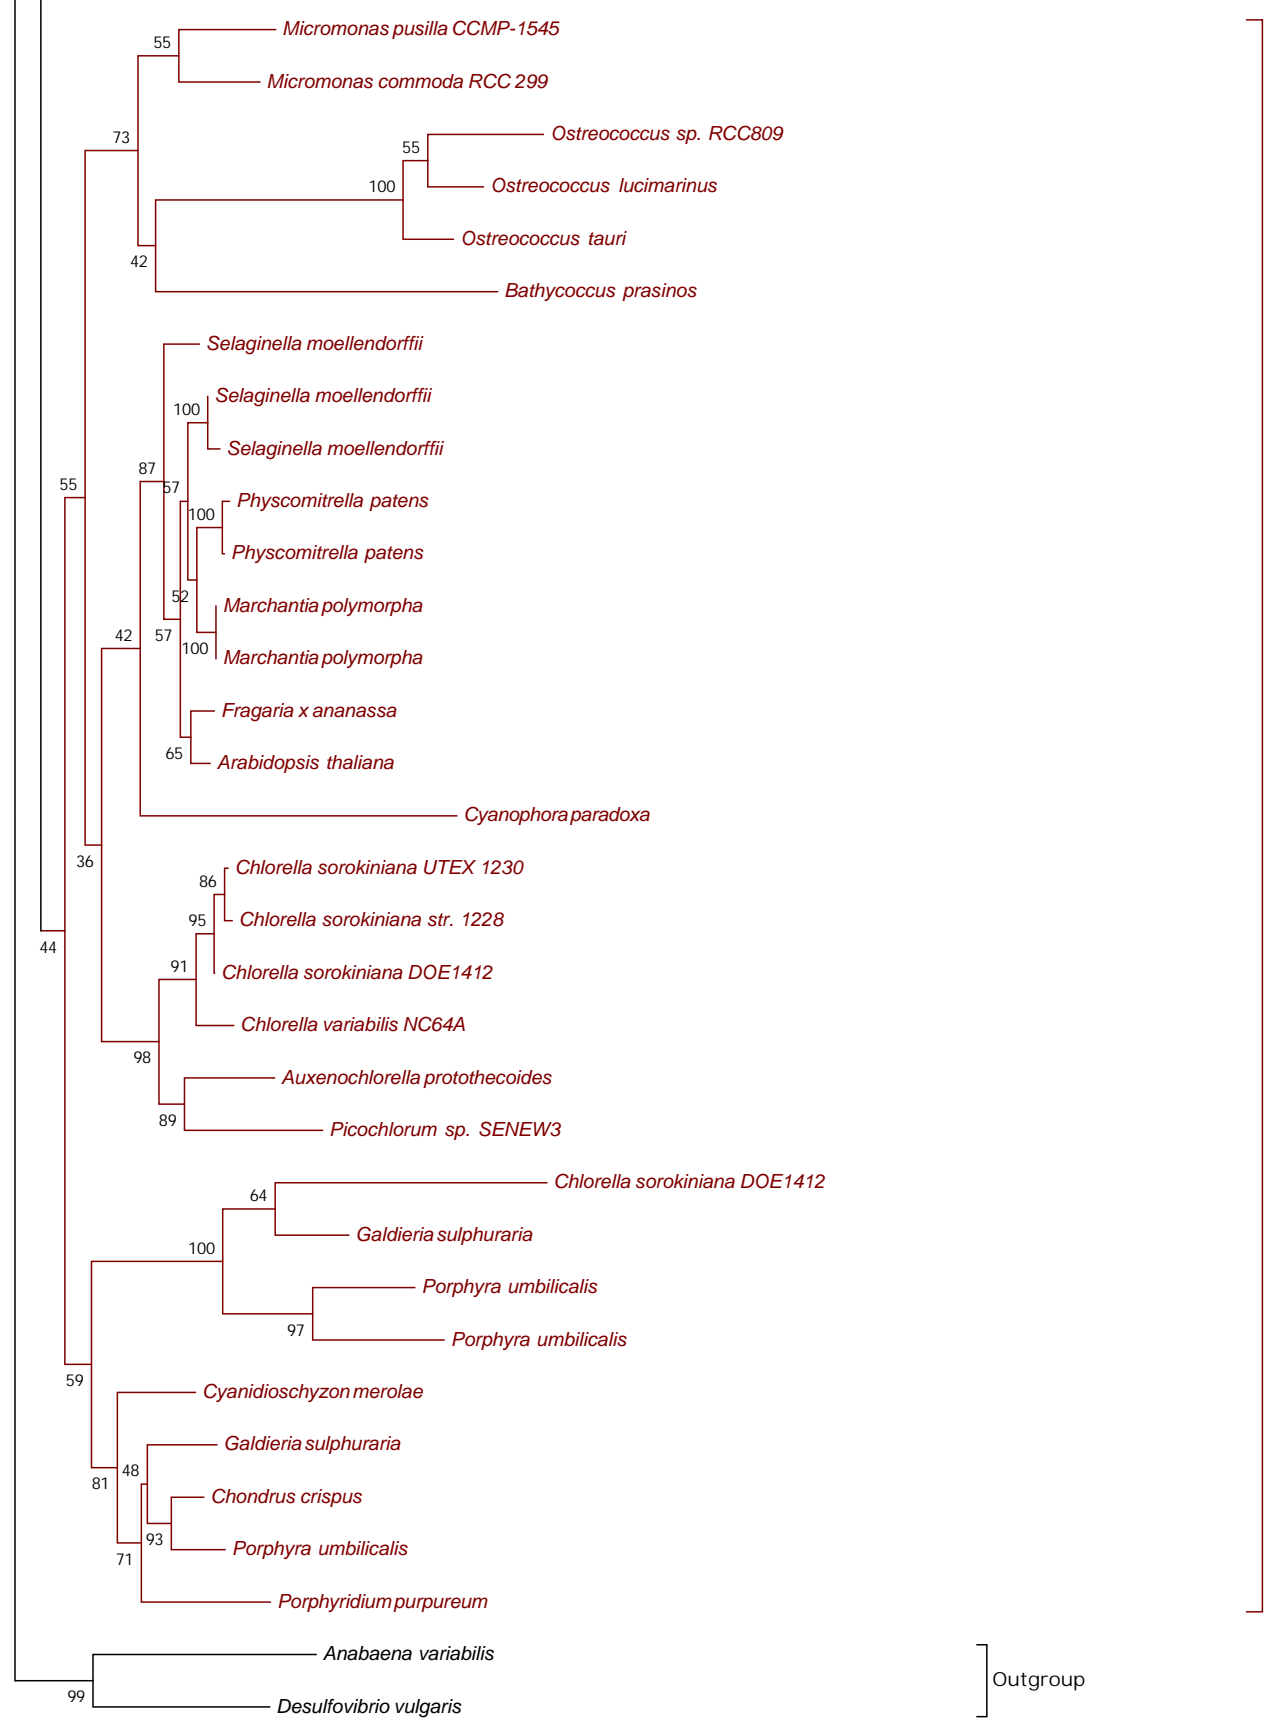

cyFBPase

Outgroup

0.1

Supplement: mmc4.pdf [file mmc4.pdf]

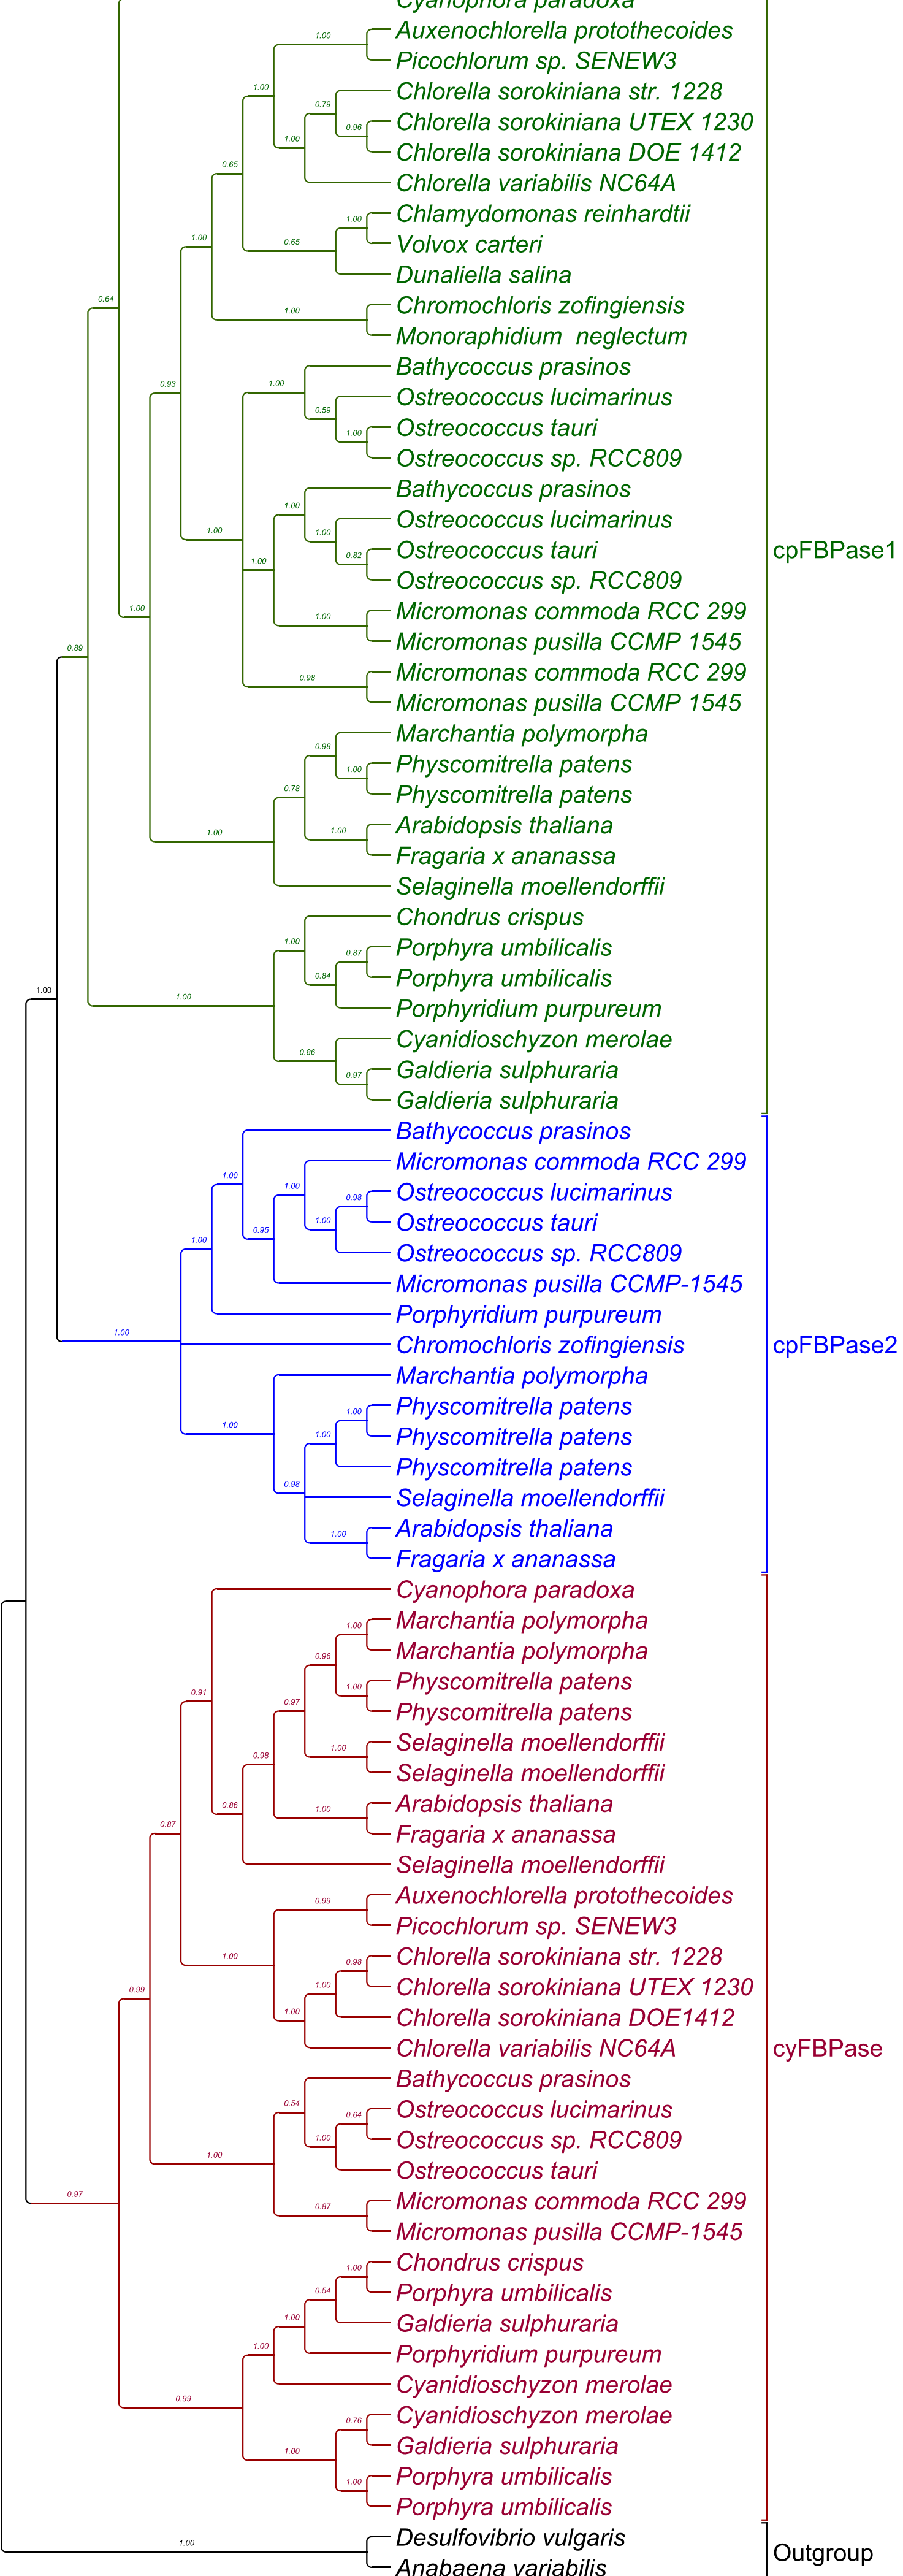

Supplement: mmc5.pdf [file mmc5.pdf]
